# Supplementary material for: Myocardial fibrosis reversion via rhACE2-electrospun fibrous patch for ventricular remodeling prevention
Source: PubMed Central journal article supplement (PMC8355140; doi:10.1038/s41536-021-00154-y), 2021-08-10
Supplement: 41536_2021_154_MOESM1_ESM.pdf [file 41536_2021_154_MOESM1_ESM.pdf]

## **Supplementary Information**

### **Myocardial fibrosis reversion via rhACE2-electrospun fibrous patch for ventricular remodeling prevention**

Zeping Qiu, Jingwen Zhao, Fanyi Huang, Luhan Bao, Yanjia Chen, Ke Yang, Wenguo  
Cui, Wei Jin

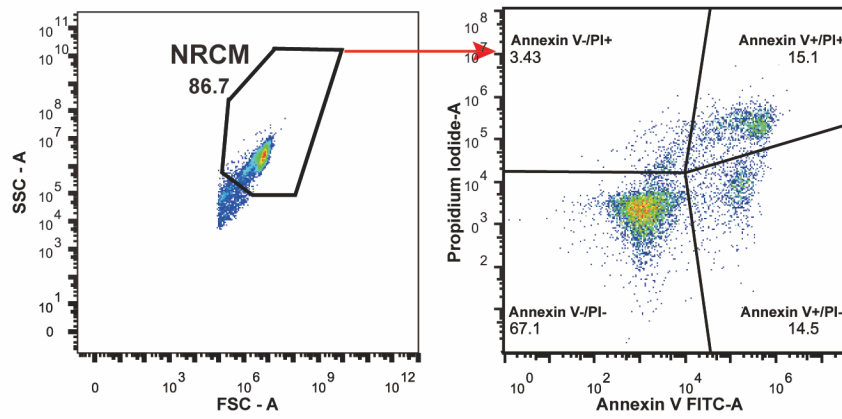

**Supplementary Figure1. Sorting Strategy for the Annexin V FITC assay relate to Figure 4c.** NRCM, neonatal rat cardiomyocytes; FSC-A, forward scatter-area and SSC-A, side scatter-area.
